# Supplementary material for: Sex ratios in flux: seasonal dynamics and methodological insights in Rumex species
Source: PeerJ. 2025 Dec 9;13:e20391. doi: 10.7717/peerj.20391 (PMC12700118; doi:10.7717/peerj.20391)
Supplement: Supplemental Information 6 — Rumex acetosa and Rumex thyrsiflorus individuals’ development observations made over the entire growing season. [file peerj-13-20391-s006.xlsx]

## Sheet: R. acetosa
Date	sex	2020.05.18 (SOWING)	2020.10.20 - 2021.04.01 (WINTER)	2021.04.02 (THE BEGINNING OF THE GROWING SEASON)	2021-04-09	2021-04-16	2021-04-23	2021-04-28	2021-04-30	2021-05-03	2021-05-05	2021-05-07	2021-05-10	2021-05-12	2021-05-14	2021-05-17	2021-05-19	2021-05-21	2021-05-24	2021.05.26 (COLLECTION OF LEAVES FROM ALL INDIVIDUALS)	2021-05-28	2021-05-31	2021-06-02	2021-06-04	2021-06-07	2021-06-09	2021-06-11	2021-06-14	2021-06-16	2021-06-18	2021-06-21	2021.06.23 (individuals cut back)
Individual				FRI	FRI	FRI	FRI	WED	FRI	MON	WED	FRI	MON	WED	FRI	MON	WED	FRI	MON	WED	FRI	MON	WED	FRI	MON	WED	FRI	MON	WED	FRI	MON	WED
A-001		sowing	no changes	-	-	-	-	-	-	-	-	-	-	-	-	-	-	no changes	no changes	no changes	no changes	no changes	no changes	no changes	no changes	no changes	no changes	no changes	no changes	no changes	no changes	no changes
A-002		sowing	no changes	-	-	-	-	-	-	-	-	-	-	-	-	-	-	no changes	no changes	no changes	no changes	no changes	no changes	no changes	no changes	no changes	no changes	no changes	no changes	no changes	no changes	no changes
A-003	M	sowing	no changes	leaves	leaves	leaves	leaves	leaves	inflorescences (M)	inflorescences (M)	inflorescences (M)	inflorescences (M)	inflorescences (M)	inflorescences (M)	inflorescences (M)	pollen production	pollen production	pollen production	pollen production	leaves	leaves	leaves	leaves	leaves	leaves	leaves	leaves	leaves	leaves	leaves	withering	withering
A-004		sowing	no changes	-	-	-	-	-	-	-	-	-	-	-	-	-	-	no changes	no changes	no changes	no changes	no changes	no changes	no changes	no changes	no changes	no changes	no changes	no changes	no changes	no changes	no changes
A-005	F	sowing	no changes	leaves	leaves	leaves	leaves	leaves	leaves	leaves	leaves	leaves	inflorescences (F)	inflorescences (F)	inflorescences (F)	inflorescences (F)	inflorescences (F)	inflorescences (F)	inflorescences (F)	fruits	fruits	fruits	fruits	fruits	fruits	fruits	fruits	fruits, seeds collected	fruits	fruits	fruits	fruits
A-006		sowing	no changes	-	-	-	-	-	-	-	-	-	-	-	-	-	-	no changes	no changes	no changes	no changes	no changes	no changes	no changes	no changes	no changes	no changes	no changes	no changes	no changes	no changes	no changes
A-007		sowing	no changes	-	-	-	-	-	-	-	-	-	-	-	-	-	-	no changes	no changes	no changes	no changes	no changes	no changes	no changes	no changes	no changes	no changes	no changes	no changes	no changes	no changes	no changes
A-008		sowing	no changes	-	-	-	-	-	-	-	-	-	-	-	-	-	-	no changes	no changes	no changes	no changes	no changes	no changes	no changes	no changes	no changes	no changes	no changes	no changes	no changes	no changes	no changes
A-009		sowing	no changes	-	-	-	-	-	-	-	-	-	-	-	-	-	-	no changes	no changes	no changes	no changes	no changes	no changes	no changes	no changes	no changes	no changes	no changes	no changes	no changes	no changes	no changes
A-010		sowing	no changes	-	-	-	-	-	-	-	-	-	-	-	-	-	-	no changes	no changes	no changes	no changes	no changes	no changes	no changes	no changes	no changes	no changes	no changes	no changes	no changes	no changes	no changes
A-011		sowing	no changes	-	-	-	-	-	-	-	-	-	-	-	-	-	-	no changes	no changes	no changes	no changes	no changes	no changes	no changes	no changes	no changes	no changes	no changes	no changes	no changes	no changes	no changes
A-012		sowing	no changes	-	-	-	-	-	-	-	-	-	-	-	-	-	-	no changes	no changes	no changes	no changes	no changes	no changes	no changes	no changes	no changes	no changes	no changes	no changes	no changes	no changes	no changes
A-013		sowing	no changes	-	-	-	-	-	-	-	-	-	-	-	-	-	-	no changes	no changes	no changes	no changes	no changes	no changes	no changes	no changes	no changes	no changes	no changes	no changes	no changes	no changes	no changes
A-014		sowing	no changes	-	-	-	-	-	-	-	-	-	-	-	-	-	-	no changes	no changes	no changes	no changes	no changes	no changes	no changes	no changes	no changes	no changes	no changes	no changes	no changes	no changes	no changes
A-015		sowing	no changes	-	-	-	-	-	-	-	-	-	-	-	-	-	-	no changes	no changes	no changes	no changes	no changes	no changes	no changes	no changes	no changes	no changes	no changes	no changes	no changes	no changes	no changes
A-016		sowing	no changes	-	-	-	-	-	-	-	-	-	-	-	-	-	-	no changes	no changes	no changes	no changes	no changes	no changes	no changes	no changes	no changes	no changes	no changes	no changes	no changes	no changes	no changes
A-017		sowing	no changes	-	-	-	-	-	-	-	-	-	-	-	-	-	-	no changes	no changes	no changes	no changes	no changes	no changes	no changes	no changes	no changes	no changes	no changes	no changes	no changes	no changes	no changes
A-018		sowing	no changes	-	-	-	-	-	-	-	-	-	-	-	-	-	-	no changes	no changes	no changes	no changes	no changes	no changes	no changes	no changes	no changes	no changes	no changes	no changes	no changes	no changes	no changes
A-019	M	sowing	no changes	leaves	leaves	leaves	leaves	leaves	leaves	inflorescences (M)	inflorescences (M)	inflorescences (M)	inflorescences (M)	inflorescences (M)	inflorescences (M)	inflorescences (M)	inflorescences (M)	pollen production	pollen production	pollen production, pollen collected	leaves	leaves	leaves	leaves	leaves	withering	withering	withering	withering	withering	withering	withering
A-020	M	sowing	no changes	leaves	leaves	leaves	leaves	leaves	leaves	inflorescences (M)	inflorescences (M)	inflorescences (M)	inflorescences (M)	inflorescences (M)	inflorescences (M)	inflorescences (M)	inflorescences (M)	pollen production	pollen production	leaves	leaves	leaves	leaves	leaves	leaves	leaves	leaves	leaves	leaves	leaves	withering	withering
A-021		sowing	no changes	-	-	-	-	-	-	-	-	-	-	-	-	-	-	no changes	no changes	no changes	no changes	no changes	no changes	no changes	no changes	no changes	no changes	no changes	no changes	no changes	no changes	no changes
A-022	M	sowing	no changes	leaves	leaves	leaves	leaves	leaves	inflorescences (M)	inflorescences (M)	inflorescences (M)	inflorescences (M)	inflorescences (M)	inflorescences (M)	inflorescences (M)	inflorescences (M)	pollen production	pollen production	leaves	leaves	leaves	leaves	leaves	leaves	leaves	leaves	withering	withering	withering	withering	withering	withering
A-023		sowing	no changes	-	-	-	-	-	-	-	-	-	-	-	-	-	-	no changes	no changes	no changes	no changes	no changes	no changes	no changes	no changes	no changes	no changes	no changes	no changes	no changes	no changes	no changes
A-024		sowing	no changes	-	-	-	-	-	-	-	-	-	-	-	-	-	-	no changes	no changes	no changes	no changes	no changes	no changes	no changes	no changes	no changes	no changes	no changes	no changes	no changes	no changes	no changes
A-025	F	sowing	no changes	leaves	leaves	leaves	leaves	leaves	leaves	leaves	leaves	inflorescences (F)	inflorescences (F)	inflorescences (F)	inflorescences (F)	inflorescences (F)	inflorescences (F)	inflorescences (F)	inflorescences (F)	inflorescences (F)	fruits	fruits	fruits	fruits	fruits	fruits	fruits	fruits, seeds collected	fruits	fruits	fruits	fruits
A-026	M	sowing	no changes	leaves	leaves	leaves	leaves	inflorescences (M)	inflorescences (M)	inflorescences (M)	inflorescences (M)	inflorescences (M)	inflorescences (M)	inflorescences (M)	inflorescences (M)	pollen production	pollen production	pollen production	pollen production	leaves	leaves	leaves	leaves	leaves	leaves	leaves	leaves	leaves	withering	withering	withering	withering
A-027		sowing	no changes	-	-	-	-	-	-	-	-	-	-	-	-	-	-	no changes	no changes	no changes	no changes	no changes	no changes	no changes	no changes	no changes	no changes	no changes	no changes	no changes	no changes	no changes
A-028		sowing	no changes	-	-	-	-	-	-	-	-	-	-	-	-	-	-	no changes	no changes	no changes	no changes	no changes	no changes	no changes	no changes	no changes	no changes	no changes	no changes	no changes	no changes	no changes
A-029		sowing	no changes	-	-	-	-	-	-	-	-	-	-	-	-	-	-	no changes	no changes	no changes	no changes	no changes	no changes	no changes	no changes	no changes	no changes	no changes	no changes	no changes	no changes	no changes
A-030		sowing	no changes	-	-	-	-	-	-	-	-	-	-	-	-	-	-	no changes	no changes	no changes	no changes	no changes	no changes	no changes	no changes	no changes	no changes	no changes	no changes	no changes	no changes	no changes
A-031	M/F	sowing	no changes	leaves	leaves	leaves	leaves	inflorescences (M)	inflorescences (M)	inflorescences (M)	inflorescences (M) & (F)	inflorescences (M) & (F)	inflorescences (M) & (F)	inflorescences (M) & (F)	inflorescences (M) & (F)	inflorescences (M) & (F)	pollen production	pollen production	pollen production + fruits	pollen production + fruits	pollen production + fruits	pollen production + fruits	pollen production + fruits	pollen production + fruits	pollen production + fruits	pollen production + fruits	seeds collected	no changes	fruits	fruits	withering + fruits	withering + fruits
A-032		sowing	no changes	-	-	-	-	-	-	-	-	-	-	-	-	-	-	no changes	no changes	no changes	no changes	no changes	no changes	no changes	no changes	no changes	no changes	no changes	no changes	no changes	no changes	no changes
A-033	F	sowing	no changes	leaves	leaves	leaves	leaves	leaves	leaves	inflorescences (F)	inflorescences (F)	inflorescences (F)	inflorescences (F)	inflorescences (F)	inflorescences (F)	inflorescences (F)	fruits	fruits	fruits	fruits	fruits	fruits	fruits	fruits	fruits	fruits	fruits	fruits, seeds collected	fruits	fruits	fruits	fruits
A-034	M	sowing	no changes	leaves	leaves	leaves	leaves	leaves	inflorescences (M)	inflorescences (M)	inflorescences (M)	inflorescences (M)	inflorescences (M)	inflorescences (M)	inflorescences (M)	inflorescences (M)	pollen production	pollen production	pollen production	pollen production	leaves	leaves	leaves	leaves	leaves	leaves	leaves	leaves	withering	withering	withering	withering
A-035	F	sowing	no changes	leaves	leaves	leaves	leaves	leaves	leaves	leaves	leaves	inflorescences (F)	inflorescences (F)	inflorescences (F)	inflorescences (F)	inflorescences (F)	inflorescences (F)	inflorescences (F)	fruits	fruits	fruits	fruits	fruits	fruits	fruits	fruits	fruits	fruits, seeds collected	fruits	fruits	fruits	fruits
A-036		sowing	no changes	-	-	-	-	-	-	-	-	-	-	-	-	-	-	no changes	no changes	no changes	no changes	no changes	no changes	no changes	no changes	no changes	no changes	no changes	no changes	no changes	no changes	no changes
A-037		sowing	no changes	-	-	-	-	-	-	-	-	-	-	-	-	-	-	no changes	no changes	no changes	no changes	no changes	no changes	no changes	no changes	no changes	no changes	no changes	no changes	no changes	no changes	no changes
A-038	F	sowing	no changes	leaves	leaves	leaves	leaves	leaves	leaves	inflorescences (F)	inflorescences (F)	inflorescences (F)	inflorescences (F)	inflorescences (F)	inflorescences (F)	inflorescences (F)	inflorescences (F)	inflorescences (F)	fruits	fruits	fruits	fruits	fruits	fruits	fruits	fruits	fruits	fruits, seeds collected	fruits	fruits	fruits	fruits
A-039		sowing	no changes	-	-	-	-	-	-	-	-	-	-	-	-	-	-	no changes	no changes	no changes	no changes	no changes	no changes	no changes	no changes	no changes	no changes	no changes	no changes	no changes	no changes	no changes
A-040		sowing	no changes	-	-	-	-	-	-	-	-	-	-	-	-	-	-	no changes	no changes	no changes	no changes	no changes	no changes	no changes	no changes	no changes	no changes	no changes	no changes	no changes	no changes	no changes
A-041		sowing	no changes	-	-	-	-	-	-	-	-	-	-	-	-	-	-	no changes	no changes	no changes	no changes	no changes	no changes	no changes	no changes	no changes	no changes	no changes	no changes	no changes	no changes	no changes
A-042	F	sowing	no changes	leaves	leaves	leaves	leaves	leaves	leaves	leaves	inflorescences (F)	inflorescences (F)	inflorescences (F)	inflorescences (F)	inflorescences (F)	inflorescences (F)	fruits	fruits	fruits	fruits	fruits	fruits	fruits	fruits	fruits	fruits	fruits	fruits, seeds collected	fruits	fruits	fruits	fruits
A-043	M	sowing	no changes	leaves	leaves	leaves	leaves	inflorescences (M)	inflorescences (M)	inflorescences (M)	inflorescences (M)	inflorescences (M)	inflorescences (M)	inflorescences (M)	inflorescences (M)	inflorescences (M)	pollen production	pollen production	pollen production, pollen collected	leaves	leaves	leaves	leaves	leaves	leaves	leaves	leaves	leaves	leaves	leaves	withering	withering
A-044		sowing	no changes	-	-	-	-	-	-	-	-	-	-	-	-	-	-	no changes	no changes	no changes	no changes	no changes	no changes	no changes	no changes	no changes	no changes	no changes	no changes	no changes	no changes	no changes
A-045		sowing	no changes	-	-	-	-	-	-	-	-	-	-	-	-	-	-	no changes	no changes	no changes	no changes	no changes	no changes	no changes	no changes	no changes	no changes	no changes	no changes	no changes	no changes	no changes
A-046	F	sowing	no changes	leaves	leaves	leaves	leaves	leaves	leaves	leaves	leaves	inflorescences (F)	inflorescences (F)	inflorescences (F)	inflorescences (F)	inflorescences (F)	inflorescences (F)	inflorescences (F)	inflorescences (F)	inflorescences (F)	fruits	fruits	fruits	fruits	fruits	fruits	fruits	fruits, seeds collected	fruits	fruits	fruits	fruits
A-047		sowing	no changes	-	-	-	-	-	-	-	-	-	-	-	-	-	-	no changes	no changes	no changes	no changes	no changes	no changes	no changes	no changes	no changes	no changes	no changes	no changes	no changes	no changes	no changes
A-048		sowing	no changes	-	-	-	-	-	-	-	-	-	-	-	-	-	-	no changes	no changes	no changes	no changes	no changes	no changes	no changes	no changes	no changes	no changes	no changes	no changes	no changes	no changes	no changes
A-049		sowing	no changes	-	-	-	-	-	-	-	-	-	-	-	-	-	-	no changes	no changes	no changes	no changes	no changes	no changes	no changes	no changes	no changes	no changes	no changes	no changes	no changes	no changes	no changes
A-050		sowing	no changes	-	-	-	-	-	-	-	-	-	-	-	-	-	-	no changes	no changes	no changes	no changes	no changes	no changes	no changes	no changes	no changes	no changes	no changes	no changes	no changes	no changes	no changes
A-051		sowing	no changes	-	-	-	-	-	-	-	-	-	-	-	-	-	-	no changes	no changes	no changes	no changes	no changes	no changes	no changes	no changes	no changes	no changes	no changes	no changes	no changes	no changes	no changes
A-052		sowing	no changes	-	-	-	-	-	-	-	-	-	-	-	-	-	-	no changes	no changes	no changes	no changes	no changes	no changes	no changes	no changes	no changes	no changes	no changes	no changes	no changes	no changes	no changes
A-053	M	sowing	no changes	leaves	leaves	leaves	leaves	inflorescences (M)	inflorescences (M)	inflorescences (M)	inflorescences (M)	inflorescences (M)	inflorescences (M)	inflorescences (M)	inflorescences (M)	inflorescences (M)	pollen production	pollen production	pollen production	pollen production, pollen collected	leaves	leaves	leaves	leaves	leaves	withering	withering	withering	withering	withering	withering	withering
A-054		sowing	no changes	-	-	-	-	-	-	-	-	-	-	-	-	-	-	no changes	no changes	no changes	no changes	no changes	no changes	no changes	no changes	no changes	no changes	no changes	no changes	no changes	no changes	no changes
A-055	M	sowing	no changes	leaves	leaves	leaves	leaves	inflorescences (M)	inflorescences (M)	inflorescences (M)	inflorescences (M)	inflorescences (M)	inflorescences (M)	inflorescences (M)	inflorescences (M)	pollen production	pollen production	pollen production	pollen production	leaves	leaves	leaves	leaves	leaves	leaves	withering	withering	withering	withering	withering	withering	withering
A-056		sowing	no changes	-	-	-	-	-	-	-	-	-	-	-	-	-	-	no changes	no changes	no changes	no changes	no changes	no changes	no changes	no changes	no changes	no changes	no changes	no changes	no changes	no changes	no changes
A-057		sowing	no changes	-	-	-	-	-	-	-	-	-	-	-	-	-	-	no changes	no changes	no changes	no changes	no changes	no changes	no changes	no changes	no changes	no changes	no changes	no changes	no changes	no changes	no changes
A-058	M	sowing	no changes	leaves	leaves	leaves	leaves	leaves	leaves	leaves	inflorescences (M)	inflorescences (M)	inflorescences (M)	inflorescences (M)	inflorescences (M)	inflorescences (M)	inflorescences (M)	pollen production	pollen production	pollen production	leaves	leaves	leaves	leaves	leaves	leaves	leaves	leaves	leaves	leaves	withering	withering
A-059		sowing	no changes	-	-	-	-	-	-	-	-	-	-	-	-	-	-	no changes	no changes	no changes	no changes	no changes	no changes	no changes	no changes	no changes	no changes	no changes	no changes	no changes	no changes	no changes
A-060		sowing	no changes	-	-	-	-	-	-	-	-	-	-	-	-	-	-	no changes	no changes	no changes	no changes	no changes	no changes	no changes	no changes	no changes	no changes	no changes	no changes	no changes	no changes	no changes
A-061	F	sowing	no changes	leaves	leaves	leaves	leaves	leaves	leaves	leaves	leaves	leaves	leaves	inflorescences (F)	inflorescences (F)	inflorescences (F)	inflorescences (F)	inflorescences (F)	inflorescences (F)	fruits	fruits	fruits	fruits	fruits	fruits	fruits	fruits, seeds collected	fruits	fruits	fruits	fruits	fruits
A-062	M	sowing	no changes	leaves	leaves	leaves	leaves	inflorescences (M)	inflorescences (M)	inflorescences (M)	inflorescences (M)	inflorescences (M)	inflorescences (M)	inflorescences (M)	inflorescences (M)	inflorescences (M)	pollen production	pollen production	pollen production	leaves	leaves	leaves	leaves	leaves	leaves	withering	withering	withering	withering	withering	withering	withering
A-063	M	sowing	no changes	leaves	leaves	leaves	leaves	inflorescences (M)	inflorescences (M)	inflorescences (M)	inflorescences (M)	inflorescences (M)	inflorescences (M)	inflorescences (M)	inflorescences (M)	inflorescences (M)	pollen production	pollen production	pollen production	pollen production, pollen collected	leaves	leaves	leaves	leaves	leaves	leaves	leaves	leaves	withering	withering	withering	withering
A-064		sowing	no changes	-	-	-	-	-	-	-	-	-	-	-	-	-	-	no changes	no changes	no changes	no changes	no changes	no changes	no changes	no changes	no changes	no changes	no changes	no changes	no changes	no changes	no changes
A-065	F	sowing	no changes	leaves	leaves	leaves	leaves	leaves	leaves	inflorescences (F)	inflorescences (F)	inflorescences (F)	inflorescences (F)	inflorescences (F)	inflorescences (F)	inflorescences (F)	fruits	fruits	fruits	fruits	fruits	fruits	fruits	fruits	fruits	fruits	fruits, seeds collected	fruits	fruits	fruits	fruits	fruits
A-066		sowing	no changes	-	-	-	-	-	-	-	-	-	-	-	-	-	-	no changes	no changes	no changes	no changes	no changes	no changes	no changes	no changes	no changes	no changes	no changes	no changes	no changes	no changes	no changes
A-067	M	sowing	no changes	leaves	leaves	leaves	leaves	leaves	inflorescences (M)	inflorescences (M)	inflorescences (M)	inflorescences (M)	inflorescences (M)	inflorescences (M)	inflorescences (M)	inflorescences (M)	pollen production	pollen production	pollen production	leaves	leaves	leaves	leaves	leaves	leaves	leaves	leaves	leaves	leaves	leaves	withering	withering
A-068		sowing	no changes	-	-	-	-	-	-	-	-	-	-	-	-	-	-	no changes	no changes	no changes	no changes	no changes	no changes	no changes	no changes	no changes	no changes	no changes	no changes	no changes	no changes	no changes
A-069	M	sowing	no changes	leaves	leaves	leaves	leaves	inflorescences (M)	inflorescences (M)	inflorescences (M)	inflorescences (M)	inflorescences (M)	inflorescences (M)	inflorescences (M)	inflorescences (M)	pollen production	pollen production	pollen production	leaves	leaves	leaves	leaves	leaves	withering	withering	withering	withering	withering	withering	withering	withering	withering
A-070		sowing	no changes	-	-	-	-	-	-	-	-	-	-	-	-	-	-	no changes	no changes	no changes	no changes	no changes	no changes	no changes	no changes	no changes	no changes	no changes	no changes	no changes	no changes	no changes
A-071	F	sowing	no changes	leaves	leaves	leaves	leaves	leaves	leaves	inflorescences (F)	inflorescences (F)	inflorescences (F)	inflorescences (F)	inflorescences (F)	inflorescences (F)	inflorescences (F)	fruits	fruits	fruits	fruits	fruits	fruits	fruits	fruits	fruits	fruits	fruits, seeds collected	fruits	fruits	fruits	fruits	fruits
A-072	F	sowing	no changes	leaves	leaves	leaves	leaves	leaves	leaves	inflorescences (F)	inflorescences (F)	inflorescences (F)	inflorescences (F)	inflorescences (F)	inflorescences (F)	inflorescences (F)	fruits	fruits	fruits	fruits	fruits	fruits	fruits	fruits	fruits	fruits	fruits	fruits, seeds collected	fruits	fruits	fruits	fruits
A-073		sowing	no changes	-	-	-	-	-	-	-	-	-	-	-	-	-	-	no changes	no changes	no changes	no changes	no changes	no changes	no changes	no changes	no changes	no changes	no changes	no changes	no changes	no changes	no changes
A-074	F	sowing	no changes	leaves	leaves	leaves	leaves	leaves	leaves	leaves	leaves	leaves	inflorescences (F)	inflorescences (F)	inflorescences (F)	inflorescences (F)	inflorescences (F)	inflorescences (F)	fruits	fruits	fruits	fruits	fruits	fruits	fruits	fruits	fruits	fruits, seeds collected	fruits	fruits	fruits	fruits
A-075		sowing	no changes	-	-	-	-	-	-	-	-	-	-	-	-	-	-	no changes	no changes	no changes	no changes	no changes	no changes	no changes	no changes	no changes	no changes	no changes	no changes	no changes	no changes	no changes
A-076		sowing	no changes	-	-	-	-	-	-	-	-	-	-	-	-	-	-	no changes	no changes	no changes	no changes	no changes	no changes	no changes	no changes	no changes	no changes	no changes	no changes	no changes	no changes	no changes
A-077	F	sowing	no changes	leaves	leaves	leaves	leaves	leaves	leaves	inflorescences (F)	inflorescences (F)	inflorescences (F)	inflorescences (F)	inflorescences (F)	inflorescences (F)	inflorescences (F)	fruits	fruits	fruits	fruits	fruits	fruits	fruits	fruits	fruits	fruits	fruits, seeds collected	fruits	fruits	fruits	fruits	fruits
A-078		sowing	no changes	-	-	-	-	-	-	-	-	-	-	-	-	-	-	no changes	no changes	no changes	no changes	no changes	no changes	no changes	no changes	no changes	no changes	no changes	no changes	no changes	no changes	no changes
A-079		sowing	no changes	-	-	-	-	-	-	-	-	-	-	-	-	-	-	no changes	no changes	no changes	no changes	no changes	no changes	no changes	no changes	no changes	no changes	no changes	no changes	no changes	no changes	no changes
A-080		sowing	no changes	-	-	-	-	-	-	-	-	-	-	-	-	-	-	no changes	no changes	no changes	no changes	no changes	no changes	no changes	no changes	no changes	no changes	no changes	no changes	no changes	no changes	no changes
A-081	F	sowing	no changes	leaves	leaves	leaves	leaves	leaves	leaves	leaves	inflorescences (F)	inflorescences (F)	inflorescences (F)	inflorescences (F)	inflorescences (F)	inflorescences (F)	fruits	fruits	fruits	fruits	fruits	fruits	fruits	fruits	fruits	fruits	fruits, seeds collected	fruits	fruits	fruits	fruits	fruits
A-082		sowing	no changes	-	-	-	-	-	-	-	-	-	-	-	-	-	-	no changes	no changes	no changes	no changes	no changes	no changes	no changes	no changes	no changes	no changes	no changes	no changes	no changes	no changes	no changes
A-083		sowing	no changes	-	-	-	-	-	-	-	-	-	-	-	-	-	-	no changes	no changes	no changes	no changes	no changes	no changes	no changes	no changes	no changes	no changes	no changes	no changes	no changes	no changes	no changes
A-084	M	sowing	no changes	leaves	leaves	leaves	leaves	inflorescences (M)	inflorescences (M)	inflorescences (M)	inflorescences (M)	inflorescences (M)	inflorescences (M)	inflorescences (M)	inflorescences (M)	pollen production	pollen production	pollen production	leaves	leaves	leaves	leaves	leaves	leaves	leaves	withering	withering	withering	withering	withering	withering	withering
A-085		sowing	no changes	-	-	-	-	-	-	-	-	-	-	-	-	-	-	no changes	no changes	no changes	no changes	no changes	no changes	no changes	no changes	no changes	no changes	no changes	no changes	no changes	no changes	no changes
A-086		sowing	no changes	-	-	-	-	-	-	-	-	-	-	-	-	-	-	no changes	no changes	no changes	no changes	no changes	no changes	no changes	no changes	no changes	no changes	no changes	no changes	no changes	no changes	no changes
A-087	F	sowing	no changes	leaves	leaves	leaves	leaves	leaves	leaves	inflorescences (F)	inflorescences (F)	inflorescences (F)	inflorescences (F)	inflorescences (F)	inflorescences (F)	inflorescences (F)	fruits	fruits	fruits	fruits	fruits	fruits	fruits	fruits	fruits	fruits	fruits	fruits, seeds collected	fruits	fruits	fruits	fruits
A-088	F	sowing	no changes	leaves	leaves	leaves	leaves	leaves	leaves	leaves	inflorescences (F)	inflorescences (F)	inflorescences (F)	inflorescences (F)	inflorescences (F)	inflorescences (F)	fruits	fruits	fruits	fruits	fruits	fruits	fruits	fruits	fruits	fruits	fruits	fruits, seeds collected	fruits	fruits	fruits	fruits
A-089	M	sowing	no changes	leaves	leaves	leaves	leaves	leaves	inflorescences (M)	inflorescences (M)	inflorescences (M)	inflorescences (M)	inflorescences (M)	inflorescences (M)	inflorescences (M)	inflorescences (M)	inflorescences (M)	pollen production	pollen production	pollen production, pollen collected	leaves	leaves	leaves	leaves	leaves	leaves	leaves	withering	withering	withering	withering	withering
A-090		sowing	no changes	-	-	-	-	-	-	-	-	-	-	-	-	-	-	no changes	no changes	no changes	no changes	no changes	no changes	no changes	no changes	no changes	no changes	no changes	no changes	no changes	no changes	no changes
A-091		sowing	no changes	-	-	-	-	-	-	-	-	-	-	-	-	-	-	no changes	no changes	no changes	no changes	no changes	no changes	no changes	no changes	no changes	no changes	no changes	no changes	no changes	no changes	no changes
A-092	M	sowing	no changes	leaves	leaves	leaves	leaves	inflorescences (M)	inflorescences (M)	inflorescences (M)	inflorescences (M)	inflorescences (M)	inflorescences (M)	inflorescences (M)	inflorescences (M)	inflorescences (M)	inflorescences (M)	pollen production	pollen production	leaves	leaves	leaves	leaves	leaves	leaves	leaves	withering	withering	withering	withering	withering	withering
A-093		sowing	no changes	-	-	-	-	-	-	-	-	-	-	-	-	-	-	no changes	no changes	no changes	no changes	no changes	no changes	no changes	no changes	no changes	no changes	no changes	no changes	no changes	no changes	no changes
A-094		sowing	no changes	-	-	-	-	-	-	-	-	-	-	-	-	-	-	no changes	no changes	no changes	no changes	no changes	no changes	no changes	no changes	no changes	no changes	no changes	no changes	no changes	no changes	no changes
A-095		sowing	no changes	-	-	-	-	-	-	-	-	-	-	-	-	-	-	no changes	no changes	no changes	no changes	no changes	no changes	no changes	no changes	no changes	no changes	no changes	no changes	no changes	no changes	no changes
A-096		sowing	no changes	-	-	-	-	-	-	-	-	-	-	-	-	-	-	no changes	no changes	no changes	no changes	no changes	no changes	no changes	no changes	no changes	no changes	no changes	no changes	no changes	no changes	no changes
A-097		sowing	no changes	-	-	-	-	-	-	-	-	-	-	-	-	-	-	no changes	no changes	no changes	no changes	no changes	no changes	no changes	no changes	no changes	no changes	no changes	no changes	no changes	no changes	no changes
A-098		sowing	no changes	-	-	-	-	-	-	-	-	-	-	-	-	-	-	no changes	no changes	no changes	no changes	no changes	no changes	no changes	no changes	no changes	no changes	no changes	no changes	no changes	no changes	no changes
A-099	F	sowing	no changes	-	-	-	-	-	-	-	-	-	-	-	-	-	-	no changes	no changes	no changes	no changes	no changes	no changes	no changes	no changes	no changes	no changes	no changes	leaves	leaves	leaves	leaves
A-100		sowing	no changes	-	-	-	-	-	-	-	-	-	-	-	-	-	-	no changes	no changes	no changes	no changes	no changes	no changes	no changes	no changes	no changes	no changes	no changes	no changes	no changes	no changes	no changes
A-101		sowing	no changes	-	-	-	-	-	-	-	-	-	-	-	-	-	-	no changes	no changes	no changes	no changes	no changes	no changes	no changes	no changes	no changes	no changes	no changes	no changes	no changes	no changes	no changes
A-102		sowing	no changes	-	-	-	-	-	-	-	-	-	-	-	-	-	-	no changes	no changes	no changes	no changes	no changes	no changes	no changes	no changes	no changes	no changes	no changes	no changes	no changes	no changes	no changes
A-103	F	sowing	no changes	leaves	leaves	leaves	leaves	leaves	leaves	leaves	leaves	leaves	inflorescences (F)	inflorescences (F)	inflorescences (F)	inflorescences (F)	inflorescences (F)	inflorescences (F)	inflorescences (F)	inflorescences (F)	fruits	fruits	fruits	fruits	fruits	fruits	fruits	fruits, seeds collected	fruits	fruits	fruits	fruits
A-104		sowing	no changes	-	-	-	-	-	-	-	-	-	-	-	-	-	-	no changes	no changes	no changes	no changes	no changes	no changes	no changes	no changes	no changes	no changes	no changes	no changes	no changes	no changes	no changes

## Sheet: R. thyrsiflorus
Date	sex	2020.05.18 (SOWING)	2020.10.20 - 2021.04.01 (WINTER)	2021.04.02 (THE BEGINNING OF THE GROWING SEASON)	2021-04-09	2021-04-16	2021-04-23	2021-04-28	2021-04-30	2021-05-03	2021-05-05	2021-05-07	2021-05-10	2021-05-12	2021-05-14	2021-05-17	2021-05-19	2021-05-21	2021-05-24	2021.05.26 (COLLECTION OF LEAVES FROM ALL INDIVIDUALS)	2021-05-28	2021-05-31	2021-06-02	2021-06-04	2021-06-07	2021-06-09	2021-06-11	2021-06-14	2021-06-16	2021-06-18	2021-06-21	2021.06.23 (individuals cut back)
Individual				FRI	FRI	FRI	FRI	WED	FRI	MON	WED	FRI	MON	WED	FRI	MON	WED	FRI	MON	WED	FRI	MON	WED	FRI	MON	WED	FRI	MON	WED	FRI	MON	WED
T-001		sowing	no changes	-	-	-	-	-	-	-	-	-	-	-	-	-	-	-	no changes	no changes	no changes	no changes	no changes	no changes	no changes	no changes	no changes	no changes	no changes	no changes	no changes	no changes
T-002	F	sowing	no changes	leaves	leaves	leaves	leaves	leaves	leaves	leaves	leaves	inflorescences (F)	inflorescences (F)	inflorescences (F)	inflorescences (F)	inflorescences (F)	inflorescences (F)	inflorescences (F)	inflorescences (F)	inflorescences (F)	inflorescences (F)	inflorescences (F)	inflorescences (F)	fruits	fruits	fruits	fruits	fruits	fruits	fruits	fruits	fruits, seeds collected
T-003		sowing	no changes	-	-	-	-	-	-	-	-	-	-	-	-	-	-	-	no changes	no changes	no changes	no changes	no changes	no changes	no changes	no changes	no changes	no changes	no changes	no changes	no changes	no changes
T-004		sowing	no changes	-	-	-	-	-	-	-	-	-	-	-	-	-	-	-	no changes	no changes	no changes	no changes	no changes	no changes	no changes	no changes	no changes	no changes	no changes	no changes	no changes	no changes
T-005		sowing	no changes	-	-	-	-	-	-	-	-	-	-	-	-	-	-	-	no changes	no changes	no changes	no changes	no changes	no changes	no changes	no changes	no changes	no changes	no changes	no changes	no changes	no changes
T-006		sowing	no changes	-	-	-	-	-	-	-	-	-	-	-	-	-	-	-	no changes	no changes	no changes	no changes	no changes	no changes	no changes	no changes	no changes	no changes	no changes	no changes	no changes	no changes
T-007	M	sowing	no changes	leaves	leaves	leaves	leaves	leaves	leaves	leaves	leaves	leaves	leaves	leaves	leaves	leaves	leaves	inflorescences (M)	inflorescences (M)	inflorescences (M)	inflorescences (M)	inflorescences (M)	inflorescences (M)	inflorescences (M)	inflorescences (M)	inflorescences (M)	inflorescences (M)	pollen production, pollen collected	pollen production	pollen production	pollen production	leaves
T-008		sowing	no changes	-	-	-	-	-	-	-	-	-	-	-	-	-	-	-	no changes	no changes	no changes	no changes	no changes	no changes	no changes	no changes	no changes	no changes	no changes	no changes	no changes	no changes
T-009	M	sowing	no changes	leaves	leaves	leaves	leaves	leaves	leaves	leaves	leaves	leaves	leaves	leaves	leaves	leaves	inflorescences (M)	inflorescences (M)	inflorescences (M)	inflorescences (M)	inflorescences (M)	inflorescences (M)	inflorescences (M)	inflorescences (M)	inflorescences (M)	pollen production, pollen collected	pollen production, pollen collected	pollen production	leaves	leaves	leaves	leaves
T-010		sowing	no changes	-	-	-	-	-	-	-	-	-	-	-	-	-	-	-	no changes	no changes	no changes	no changes	no changes	no changes	no changes	no changes	no changes	no changes	no changes	no changes	no changes	no changes
T-011	M	sowing	no changes	leaves	leaves	leaves	leaves	leaves	leaves	leaves	leaves	leaves	leaves	leaves	leaves	inflorescences (M)	inflorescences (M)	inflorescences (M)	inflorescences (M)	inflorescences (M)	inflorescences (M)	inflorescences (M)	inflorescences (M)	inflorescences (M)	inflorescences (M)	inflorescences (M)	inflorescences (M)	pollen production, pollen collected	pollen production	pollen production	leaves	leaves
T-012		sowing	no changes	-	-	-	-	-	-	-	-	-	-	-	-	-	-	-	no changes	no changes	no changes	no changes	no changes	no changes	no changes	no changes	no changes	no changes	no changes	no changes	no changes	no changes
T-013		sowing	no changes	-	-	-	-	-	-	-	-	-	-	-	-	-	-	-	no changes	no changes	no changes	no changes	no changes	no changes	no changes	no changes	no changes	no changes	no changes	no changes	no changes	no changes
T-014		sowing	no changes	-	-	-	-	-	-	-	-	-	-	-	-	-	-	-	no changes	no changes	no changes	no changes	no changes	no changes	no changes	no changes	no changes	no changes	no changes	no changes	no changes	no changes
T-015		sowing	no changes	-	-	-	-	-	-	-	-	-	-	-	-	-	-	-	no changes	no changes	no changes	no changes	no changes	no changes	no changes	no changes	no changes	no changes	no changes	no changes	no changes	no changes
T-016		sowing	no changes	-	-	-	-	-	-	-	-	-	-	-	-	-	-	-	no changes	no changes	no changes	no changes	no changes	no changes	no changes	no changes	no changes	no changes	no changes	no changes	no changes	no changes
T-017	M	sowing	no changes	leaves	leaves	leaves	leaves	leaves	leaves	leaves	leaves	inflorescences (M)	inflorescences (M)	inflorescences (M)	inflorescences (M)	inflorescences (M)	inflorescences (M)	inflorescences (M)	inflorescences (M)	inflorescences (M)	inflorescences (M)	inflorescences (M)	pollen production, pollen collected	pollen production	leaves	leaves	leaves	leaves	leaves	leaves	leaves	leaves
T-018	F	sowing	no changes	leaves	leaves	leaves	leaves	leaves	leaves	leaves	leaves	leaves	leaves	leaves	leaves	inflorescences (F)	inflorescences (F)	inflorescences (F)	inflorescences (F)	inflorescences (F)	inflorescences (F)	inflorescences (F)	inflorescences (F)	inflorescences (F)	inflorescences (F)	fruits	fruits	fruits	fruits	fruits	fruits	fruits, seeds collected
T-019		sowing	no changes	leaves (doesn't look like R. thyrsiflorus)	leaves (doesn't look like R. thyrsiflorus)	leaves (doesn't look like R. thyrsiflorus)	leaves (doesn't look like R. thyrsiflorus)	leaves (doesn't look like R. thyrsiflorus)	leaves (doesn't look like R. thyrsiflorus)	leaves (doesn't look like R. thyrsiflorus)	leaves (doesn't look like R. thyrsiflorus)	leaves (doesn't look like R. thyrsiflorus)	leaves (doesn't look like R. thyrsiflorus)	leaves (doesn't look like R. thyrsiflorus)	leaves (doesn't look like R. thyrsiflorus)	leaves (doesn't look like R. thyrsiflorus)	leaves (doesn't look like R. thyrsiflorus)	leaves (doesn't look like R. thyrsiflorus)	no changes	no changes	no changes	no changes	no changes	no changes	no changes	no changes	no changes	no changes	no changes	no changes	no changes	no changes
T-020		sowing	no changes	-	-	-	-	-	-	-	-	-	-	-	-	-	-	-	no changes	no changes	no changes	no changes	no changes	no changes	no changes	no changes	no changes	no changes	no changes	no changes	no changes	no changes
T-021		sowing	no changes	-	-	-	-	-	-	-	-	-	-	-	-	-	-	-	no changes	no changes	no changes	no changes	no changes	no changes	no changes	no changes	no changes	no changes	no changes	no changes	no changes	no changes
T-022		sowing	no changes	-	-	-	-	-	-	-	-	-	-	-	-	-	-	-	no changes	no changes	no changes	no changes	no changes	no changes	no changes	no changes	no changes	no changes	no changes	no changes	no changes	no changes
T-023		sowing	no changes	-	-	-	-	-	-	-	-	-	-	-	-	-	-	-	no changes	no changes	no changes	no changes	no changes	no changes	no changes	no changes	no changes	no changes	no changes	no changes	no changes	no changes
T-024	F	sowing	no changes	leaves	leaves	leaves	leaves	leaves	leaves	leaves	leaves	leaves	leaves	leaves	leaves	inflorescences (F)	inflorescences (F)	inflorescences (F)	inflorescences (F)	inflorescences (F)	inflorescences (F)	inflorescences (F)	inflorescences (F)	inflorescences (F)	inflorescences (F)	inflorescences (F)	fruits	fruits	fruits	fruits	fruits	fruits, seeds collected
T-025	M	sowing	no changes	leaves	leaves	leaves	leaves	leaves	leaves	leaves	leaves	leaves	inflorescences (M)	inflorescences (M)	inflorescences (M)	inflorescences (M)	inflorescences (M)	inflorescences (M)	inflorescences (M)	inflorescences (M)	inflorescences (M)	inflorescences (M)	pollen production, pollen collected	pollen production	leaves	leaves	leaves	leaves	leaves	leaves	leaves	leaves
T-026		sowing	no changes	-	-	-	-	-	-	-	-	-	-	-	-	-	-	-	no changes	no changes	no changes	no changes	no changes	no changes	no changes	no changes	no changes	no changes	no changes	no changes	no changes	no changes
T-027		sowing	no changes	-	-	-	-	-	-	-	-	-	-	-	-	-	-	-	no changes	no changes	no changes	no changes	no changes	no changes	no changes	no changes	no changes	no changes	no changes	no changes	no changes	no changes
T-028		sowing	no changes	-	-	-	-	-	-	-	-	-	-	-	-	-	-	-	no changes	no changes	no changes	no changes	no changes	no changes	no changes	no changes	no changes	no changes	no changes	no changes	no changes	no changes
T-029		sowing	no changes	-	-	-	-	-	-	-	-	-	-	-	-	-	-	-	no changes	no changes	no changes	no changes	no changes	no changes	no changes	no changes	no changes	no changes	no changes	no changes	no changes	no changes
T-030		sowing	no changes	-	-	-	-	-	-	-	-	-	-	-	-	-	-	-	no changes	no changes	no changes	no changes	no changes	no changes	no changes	no changes	no changes	no changes	no changes	no changes	no changes	no changes
T-031		sowing	no changes	-	-	-	-	-	-	-	-	-	-	-	-	-	-	-	no changes	no changes	no changes	no changes	no changes	no changes	no changes	no changes	no changes	no changes	no changes	no changes	no changes	no changes
T-032		sowing	no changes	-	-	-	-	-	-	-	-	-	-	-	-	-	-	-	no changes	no changes	no changes	no changes	no changes	no changes	no changes	no changes	no changes	no changes	no changes	no changes	no changes	no changes
T-033	F	sowing	no changes	leaves	leaves	leaves	leaves	leaves	leaves	leaves	leaves	leaves	leaves	leaves	leaves	leaves	leaves	leaves	leaves	inflorescences (F)	inflorescences (F)	inflorescences (F)	inflorescences (F)	inflorescences (F)	inflorescences (F)	inflorescences (F)	inflorescences (F)	fruits	fruits	fruits	fruits	fruits, seeds collected
T-034		sowing	no changes	-	-	-	-	-	-	-	-	-	-	-	-	-	-	-	no changes	no changes	no changes	no changes	no changes	no changes	no changes	no changes	no changes	no changes	no changes	no changes	no changes	no changes
T-035		sowing	no changes	-	-	-	-	-	-	-	-	-	-	-	-	-	-	-	no changes	no changes	no changes	no changes	no changes	no changes	no changes	no changes	no changes	no changes	no changes	no changes	no changes	no changes
T-036	F	sowing	no changes	leaves	leaves	leaves	leaves	leaves	leaves	leaves	leaves	leaves	inflorescences (F)	inflorescences (F)	inflorescences (F)	inflorescences (F)	inflorescences (F)	inflorescences (F)	inflorescences (F)	inflorescences (F)	inflorescences (F)	inflorescences (F)	inflorescences (F)	fruits	fruits	fruits	fruits	fruits, seeds collected	fruits	fruits	fruits	fruits
T-037		sowing	no changes	-	-	-	-	-	-	-	-	-	-	-	-	-	-	-	no changes	no changes	no changes	no changes	no changes	no changes	no changes	no changes	no changes	no changes	no changes	no changes	no changes	no changes
T-038		sowing	no changes	-	-	-	-	-	-	-	-	-	-	-	-	-	-	-	no changes	no changes	no changes	no changes	no changes	no changes	no changes	no changes	no changes	no changes	no changes	no changes	no changes	no changes
T-039	F	sowing	no changes	leaves	leaves	leaves	leaves	leaves	leaves	leaves	leaves	leaves	leaves	leaves	leaves	leaves	leaves	inflorescences (F)	inflorescences (F)	inflorescences (F)	inflorescences (F)	inflorescences (F)	inflorescences (F)	inflorescences (F)	inflorescences (F)	inflorescences (F)	inflorescences (F)	fruits	fruits	fruits	fruits	fruits, seeds collected
T-040		sowing	no changes	-	-	-	-	-	-	-	-	-	-	-	-	-	-	-	no changes	no changes	no changes	no changes	no changes	no changes	no changes	no changes	no changes	no changes	no changes	no changes	no changes	no changes
T-041		sowing	no changes	-	-	-	-	-	-	-	-	-	-	-	-	-	-	-	no changes	no changes	no changes	no changes	no changes	no changes	no changes	no changes	no changes	no changes	no changes	no changes	no changes	no changes
T-042		sowing	no changes	-	-	-	-	-	-	-	-	-	-	-	-	-	-	-	no changes	no changes	no changes	no changes	no changes	no changes	no changes	no changes	no changes	no changes	no changes	no changes	no changes	no changes
T-043		sowing	no changes	-	-	-	-	-	-	-	-	-	-	-	-	-	-	-	no changes	no changes	no changes	no changes	no changes	no changes	no changes	no changes	no changes	no changes	no changes	no changes	no changes	no changes
T-044		sowing	no changes	-	-	-	-	-	-	-	-	-	-	-	-	-	-	-	no changes	no changes	no changes	no changes	no changes	no changes	no changes	no changes	no changes	no changes	no changes	no changes	no changes	no changes
T-045		sowing	no changes	-	-	-	-	-	-	-	-	-	-	-	-	-	-	-	no changes	no changes	no changes	no changes	no changes	no changes	no changes	no changes	no changes	no changes	no changes	no changes	no changes	no changes
T-046	F	sowing	no changes	leaves	leaves	leaves	leaves	leaves	leaves	leaves	leaves	leaves	leaves	inflorescences (F)	inflorescences (F)	inflorescences (F)	inflorescences (F)	inflorescences (F)	inflorescences (F)	inflorescences (F)	inflorescences (F)	inflorescences (F)	inflorescences (F)	inflorescences (F)	fruits	fruits	fruits	fruits	fruits	fruits	fruits	fruits, seeds collected
T-047		sowing	no changes	-	-	-	-	-	-	-	-	-	-	-	-	-	-	-	no changes	no changes	no changes	no changes	no changes	no changes	no changes	no changes	no changes	no changes	no changes	no changes	no changes	no changes
T-048		sowing	no changes	-	-	-	-	-	-	-	-	-	-	-	-	-	-	-	no changes	no changes	no changes	no changes	no changes	no changes	no changes	no changes	no changes	no changes	no changes	no changes	no changes	no changes
T-049		sowing	no changes	-	-	-	-	-	-	-	-	-	-	-	-	-	-	-	no changes	no changes	no changes	no changes	no changes	no changes	no changes	no changes	no changes	no changes	no changes	no changes	no changes	no changes
T-050		sowing	no changes	-	-	-	-	-	-	-	-	-	-	-	-	-	-	-	no changes	no changes	no changes	no changes	no changes	no changes	no changes	no changes	no changes	no changes	no changes	no changes	no changes	no changes
T-051		sowing	no changes	-	-	-	-	-	-	-	-	-	-	-	-	-	-	-	no changes	no changes	no changes	no changes	no changes	no changes	no changes	no changes	no changes	no changes	no changes	no changes	no changes	no changes
T-052		sowing	no changes	-	-	-	-	-	-	-	-	-	-	-	-	-	-	-	no changes	no changes	no changes	no changes	no changes	no changes	no changes	no changes	no changes	no changes	no changes	no changes	no changes	no changes
T-053	F	sowing	no changes	leaves	leaves	leaves	leaves	leaves	leaves	leaves	leaves	leaves	leaves	inflorescences (F)	inflorescences (F)	inflorescences (F)	inflorescences (F)	inflorescences (F)	inflorescences (F)	inflorescences (F)	inflorescences (F)	inflorescences (F)	inflorescences (F)	inflorescences (F)	inflorescences (F)	fruits	fruits	fruits	fruits	fruits	fruits	fruits, seeds collected
T-054		sowing	no changes	-	-	-	-	-	-	-	-	-	-	-	-	-	-	-	no changes	no changes	no changes	no changes	no changes	no changes	no changes	no changes	no changes	no changes	no changes	no changes	no changes	no changes
T-055		sowing	no changes	-	-	-	-	-	-	-	-	-	-	-	-	-	-	-	no changes	no changes	no changes	no changes	no changes	no changes	no changes	no changes	no changes	no changes	no changes	no changes	no changes	no changes
T-056		sowing	no changes	-	-	-	-	-	-	-	-	-	-	-	-	-	-	-	no changes	no changes	no changes	no changes	no changes	no changes	no changes	no changes	no changes	no changes	no changes	no changes	no changes	no changes
T-057		sowing	no changes	-	-	-	-	-	-	-	-	-	-	-	-	-	-	-	no changes	no changes	no changes	no changes	no changes	no changes	no changes	no changes	no changes	no changes	no changes	no changes	no changes	no changes
T-058		sowing	no changes	-	-	-	-	-	-	-	-	-	-	-	-	-	-	-	no changes	no changes	no changes	no changes	no changes	no changes	no changes	no changes	no changes	no changes	no changes	no changes	no changes	no changes
T-059	F	sowing	no changes	leaves	leaves	leaves	leaves	leaves	leaves	leaves	leaves	leaves	leaves	leaves	inflorescences (F)	inflorescences (F)	inflorescences (F)	inflorescences (F)	inflorescences (F)	inflorescences (F)	inflorescences (F)	inflorescences (F)	inflorescences (F)	inflorescences (F)	inflorescences (F)	fruits	fruits	fruits	fruits	fruits	fruits	fruits, seeds collected
T-060		sowing	no changes	-	-	-	-	-	-	-	-	-	-	-	-	-	-	-	no changes	no changes	no changes	no changes	no changes	no changes	no changes	no changes	no changes	no changes	no changes	no changes	no changes	no changes
T-061		sowing	no changes	leaves (doesn't look like R. thyrsiflorus)	leaves (doesn't look like R. thyrsiflorus)	leaves (doesn't look like R. thyrsiflorus)	leaves (doesn't look like R. thyrsiflorus)	leaves (doesn't look like R. thyrsiflorus)	leaves (doesn't look like R. thyrsiflorus)	leaves (doesn't look like R. thyrsiflorus)	leaves (doesn't look like R. thyrsiflorus)	leaves (doesn't look like R. thyrsiflorus)	leaves (doesn't look like R. thyrsiflorus)	leaves (doesn't look like R. thyrsiflorus)	leaves (doesn't look like R. thyrsiflorus)	leaves (doesn't look like R. thyrsiflorus)	leaves (doesn't look like R. thyrsiflorus)	leaves (doesn't look like R. thyrsiflorus)	no changes	no changes	no changes	no changes	no changes	no changes	no changes	no changes	no changes	no changes	no changes	no changes	no changes	no changes
T-062	F	sowing	no changes	leaves	leaves	leaves	leaves	leaves	leaves	leaves	leaves	leaves	inflorescences (F)	inflorescences (F)	inflorescences (F)	inflorescences (F)	inflorescences (F)	inflorescences (F)	inflorescences (F)	inflorescences (F)	inflorescences (F)	inflorescences (F)	fruits	fruits	fruits	fruits	fruits	fruits, seeds collected	fruits	fruits	fruits	fruits
T-063		sowing	no changes	-	-	-	-	-	-	-	-	-	-	-	-	-	-	-	no changes	no changes	no changes	no changes	no changes	no changes	no changes	no changes	no changes	no changes	no changes	no changes	no changes	no changes
T-064	F	sowing	no changes	leaves	leaves	leaves	leaves	leaves	leaves	leaves	inflorescences (F)	inflorescences (F)	inflorescences (F)	inflorescences (F)	inflorescences (F)	inflorescences (F)	inflorescences (F)	inflorescences (F)	inflorescences (F)	inflorescences (F)	inflorescences (F)	inflorescences (F)	inflorescences (F)	inflorescences (F)	fruits	fruits	fruits	fruits	fruits	fruits	fruits	fruits, seeds collected
T-065		sowing	no changes	-	-	-	-	-	-	-	-	-	-	-	-	-	-	-	no changes	no changes	no changes	no changes	no changes	no changes	no changes	no changes	no changes	no changes	no changes	no changes	no changes	no changes
T-066		sowing	no changes	-	-	-	-	-	-	-	-	-	-	-	-	-	-	-	no changes	no changes	no changes	no changes	no changes	no changes	no changes	no changes	no changes	no changes	no changes	no changes	no changes	no changes
T-067	F	sowing	no changes	leaves	leaves	leaves	leaves	leaves	leaves	leaves	leaves	leaves	leaves	leaves	leaves	inflorescences (F)	inflorescences (F)	inflorescences (F)	inflorescences (F)	inflorescences (F)	inflorescences (F)	inflorescences (F)	inflorescences (F)	inflorescences (F)	inflorescences (F)	inflorescences (F)	fruits	fruits	fruits	fruits	fruits	fruits, seeds collected
T-068		sowing	no changes	-	-	-	-	-	-	-	-	-	-	-	-	-	-	-	no changes	no changes	no changes	no changes	no changes	no changes	no changes	no changes	no changes	no changes	no changes	no changes	no changes	no changes
T-069		sowing	no changes	-	-	-	-	-	-	-	-	-	-	-	-	-	-	-	no changes	no changes	no changes	no changes	no changes	no changes	no changes	no changes	no changes	no changes	no changes	no changes	no changes	no changes
T-070		sowing	no changes	-	-	-	-	-	-	-	-	-	-	-	-	-	-	-	no changes	no changes	no changes	no changes	no changes	no changes	no changes	no changes	no changes	no changes	no changes	no changes	no changes	no changes
T-071		sowing	no changes	-	-	-	-	-	-	-	-	-	-	-	-	-	-	-	no changes	no changes	no changes	no changes	no changes	no changes	no changes	no changes	no changes	no changes	no changes	no changes	no changes	no changes
T-072		sowing	no changes	-	-	-	-	-	-	-	-	-	-	-	-	-	-	-	no changes	no changes	no changes	no changes	no changes	no changes	no changes	no changes	no changes	no changes	no changes	no changes	no changes	no changes
T-073	F	sowing	no changes	leaves	leaves	leaves	leaves	leaves	leaves	leaves	leaves	leaves	leaves	leaves	inflorescences (F)	inflorescences (F)	inflorescences (F)	inflorescences (F)	inflorescences (F)	inflorescences (F)	inflorescences (F)	inflorescences (F)	inflorescences (F)	inflorescences (F)	inflorescences (F)	fruits	fruits	fruits	fruits	fruits	fruits	fruits, seeds collected
T-074		sowing	no changes	-	-	-	-	-	-	-	-	-	-	-	-	-	-	-	no changes	no changes	no changes	no changes	no changes	no changes	no changes	no changes	no changes	no changes	no changes	no changes	no changes	no changes
T-075		sowing	no changes	-	-	-	-	-	-	-	-	-	-	-	-	-	-	-	no changes	no changes	no changes	no changes	no changes	no changes	no changes	no changes	no changes	no changes	no changes	no changes	no changes	no changes
T-076		sowing	no changes	-	-	-	-	-	-	-	-	-	-	-	-	-	-	-	no changes	no changes	no changes	no changes	no changes	no changes	no changes	no changes	no changes	no changes	no changes	no changes	no changes	no changes
T-077		sowing	no changes	-	-	-	-	-	-	-	-	-	-	-	-	-	-	-	no changes	no changes	no changes	no changes	no changes	no changes	no changes	no changes	no changes	no changes	no changes	no changes	no changes	no changes
T-078	M	sowing	no changes	leaves	leaves	leaves	leaves	leaves	leaves	leaves	leaves	leaves	inflorescences (M)	inflorescences (M)	inflorescences (M)	inflorescences (M)	inflorescences (M)	inflorescences (M)	inflorescences (M)	inflorescences (M)	inflorescences (M)	inflorescences (M)	inflorescences (M)	pollen production, pollen collected	pollen production	pollen production	pollen production	pollen production	pollen production	leaves	leaves	leaves
T-079	M	sowing	no changes	leaves	leaves	leaves	leaves	leaves	leaves	leaves	leaves	leaves	inflorescences (M)	inflorescences (M)	inflorescences (M)	inflorescences (M)	inflorescences (M)	inflorescences (M)	inflorescences (M)	inflorescences (M)	inflorescences (M)	inflorescences (M)	inflorescences (M)	pollen production, pollen collected	pollen production	pollen production	pollen production	pollen production	pollen production	leaves	leaves	leaves
T-080		sowing	no changes	-	-	-	-	-	-	-	-	-	-	-	-	-	-	-	no changes	no changes	no changes	no changes	no changes	no changes	no changes	no changes	no changes	no changes	no changes	no changes	no changes	no changes
T-081	M	sowing	no changes	leaves	leaves	leaves	leaves	leaves	leaves	leaves	leaves	leaves	leaves	leaves	leaves	inflorescences (M)	inflorescences (M)	inflorescences (M)	inflorescences (M)	pollen production, pollen collected	pollen production, pollen collected	pollen production	leaves	leaves	leaves	leaves	leaves	leaves	leaves	leaves	leaves	leaves
T-082		sowing	no changes	-	-	-	-	-	-	-	-	-	-	-	-	-	-	-	no changes	no changes	no changes	no changes	no changes	no changes	no changes	no changes	no changes	no changes	no changes	no changes	no changes	no changes
T-083	F	sowing	no changes	leaves	leaves	leaves	leaves	leaves	leaves	leaves	leaves	leaves	inflorescences (F)	inflorescences (F)	inflorescences (F)	inflorescences (F)	inflorescences (F)	inflorescences (F)	inflorescences (F)	inflorescences (F)	inflorescences (F)	inflorescences (F)	inflorescences (F)	fruits	fruits	fruits	fruits	fruits	fruits, seeds collected	fruits	fruits	fruits
T-084		sowing	no changes	-	-	-	-	-	-	-	-	-	-	-	-	-	-	-	no changes	no changes	no changes	no changes	no changes	no changes	no changes	no changes	no changes	no changes	no changes	no changes	no changes	no changes
T-085	M	sowing	no changes	leaves	leaves	leaves	leaves	leaves	leaves	leaves	leaves	inflorescences (M)	inflorescences (M)	inflorescences (M)	inflorescences (M)	inflorescences (M)	inflorescences (M)	inflorescences (M)	inflorescences (M)	inflorescences (M)	inflorescences (M)	inflorescences (M)	pollen production, pollen collected	pollen production	pollen production	pollen production	leaves	leaves	leaves	leaves	leaves	leaves
T-086		sowing	no changes	-	-	-	-	-	-	-	-	-	-	-	-	-	-	-	no changes	no changes	no changes	no changes	no changes	no changes	no changes	no changes	no changes	no changes	no changes	no changes	no changes	no changes
T-087		sowing	no changes	-	-	-	-	-	-	-	-	-	-	-	-	-	-	-	no changes	no changes	no changes	no changes	no changes	no changes	no changes	no changes	no changes	no changes	no changes	no changes	no changes	no changes
T-088		sowing	no changes	-	-	-	-	-	-	-	-	-	-	-	-	-	-	-	no changes	no changes	no changes	no changes	no changes	no changes	no changes	no changes	no changes	no changes	no changes	no changes	no changes	no changes
T-089		sowing	no changes	-	-	-	-	-	-	-	-	-	-	-	-	-	-	-	no changes	no changes	no changes	no changes	no changes	no changes	no changes	no changes	no changes	no changes	no changes	no changes	no changes	no changes
T-090		sowing	no changes	-	-	-	-	-	-	-	-	-	-	-	-	-	-	-	no changes	no changes	no changes	no changes	no changes	no changes	no changes	no changes	no changes	no changes	no changes	no changes	no changes	no changes
T-091		sowing	no changes	-	-	-	-	-	-	-	-	-	-	-	-	-	-	-	no changes	no changes	no changes	no changes	no changes	no changes	no changes	no changes	no changes	no changes	no changes	no changes	no changes	no changes
T-092		sowing	no changes	-	-	-	-	-	-	-	-	-	-	-	-	-	-	-	no changes	no changes	no changes	no changes	no changes	no changes	no changes	no changes	no changes	no changes	no changes	no changes	no changes	no changes
T-093		sowing	no changes	-	-	-	-	-	-	-	-	-	-	-	-	-	-	-	no changes	no changes	no changes	no changes	no changes	no changes	no changes	no changes	no changes	no changes	no changes	no changes	no changes	no changes
T-094		sowing	no changes	-	-	-	-	-	-	-	-	-	-	-	-	-	-	-	no changes	no changes	no changes	no changes	no changes	no changes	no changes	no changes	no changes	no changes	no changes	no changes	no changes	no changes
T-095		sowing	no changes	-	-	-	-	-	-	-	-	-	-	-	-	-	-	-	no changes	no changes	no changes	no changes	no changes	no changes	no changes	no changes	no changes	no changes	no changes	no changes	no changes	no changes
T-096		sowing	no changes	-	-	-	-	-	-	-	-	-	-	-	-	-	-	-	no changes	no changes	no changes	no changes	no changes	no changes	no changes	no changes	no changes	no changes	no changes	no changes	no changes	no changes
T-097	F	sowing	no changes	leaves	leaves	leaves	leaves	leaves	leaves	leaves	leaves	leaves	leaves	leaves	inflorescences (F)	inflorescences (F)	inflorescences (F)	inflorescences (F)	inflorescences (F)	inflorescences (F)	inflorescences (F)	inflorescences (F)	inflorescences (F)	inflorescences (F)	inflorescences (F)	fruits	fruits	fruits	fruits, seeds collected	fruits	fruits	fruits
T-098		sowing	no changes	-	-	-	-	-	-	-	-	-	-	-	-	-	-	-	no changes	no changes	no changes	no changes	no changes	no changes	no changes	no changes	no changes	no changes	no changes	no changes	no changes	no changes
T-099		sowing	no changes	-	-	-	-	-	-	-	-	-	-	-	-	-	-	-	no changes	no changes	no changes	no changes	no changes	no changes	no changes	no changes	no changes	no changes	no changes	no changes	no changes	no changes
T-100	F	sowing	no changes	leaves	leaves	leaves	leaves	leaves	leaves	leaves	leaves	inflorescences (F)	inflorescences (F)	inflorescences (F)	inflorescences (F)	inflorescences (F)	inflorescences (F)	inflorescences (F)	inflorescences (F)	inflorescences (F)	inflorescences (F)	inflorescences (F)	fruits	fruits	fruits	fruits	fruits	fruits, seeds collected	fruits	fruits	fruits	fruits
T-101		sowing	no changes	-	-	-	-	-	-	-	-	-	-	-	-	-	-	-	no changes	no changes	no changes	no changes	no changes	no changes	no changes	no changes	no changes	no changes	no changes	no changes	no changes	no changes
T-102		sowing	no changes	-	-	-	-	-	-	-	-	-	-	-	-	-	-	-	no changes	no changes	no changes	no changes	no changes	no changes	no changes	no changes	no changes	no changes	no changes	no changes	no changes	no changes
T-103		sowing	no changes	-	-	-	-	-	-	-	-	-	-	-	-	-	-	-	no changes	no changes	no changes	no changes	no changes	no changes	no changes	no changes	no changes	no changes	no changes	no changes	no changes	no changes
T-104	F	sowing	no changes	leaves	leaves	leaves	leaves	leaves	leaves	leaves	leaves	inflorescences (F)	inflorescences (F)	inflorescences (F)	inflorescences (F)	inflorescences (F)	inflorescences (F)	inflorescences (F)	inflorescences (F)	inflorescences (F)	inflorescences (F)	inflorescences (F)	inflorescences (F)	fruits	fruits	fruits	fruits	fruits, seeds collected	fruits	fruits	fruits	fruits
